# Supplementary material for: Ammunition Waste Pollution and Preliminary Assessment of Risks to Child Health from Toxic Metals at the Greek Refugee Camp Mavrovouni
Source: MDPI journal article supplement (doi:10.3390/ijerph191610086), 2022-08-15
Supplement: s1 [file s1]

**Table S1.** Information on the quality of the chemical analysis. The standard reference materials (SRM) analyzed for concentration of Cu, Sb, Pb, and Bi were NCS ZC 73007 Soil, NIST SRM 2710a: Montana I Soil, Highly elevated trace element concentrations, and NIST SRM 2711a: Montana II Soil, Moderately elevated trace element concentrations. Number of replicates was four. Bias is indicated relative to certified value (\*) or reference value (\*\*); where no value is issued, (-) is displayed.

| SRM          | Quality indicator        | Pb              | Sb              | Bi              | Cu              | U               |
|--------------|--------------------------|-----------------|-----------------|-----------------|-----------------|-----------------|
| NCS ZC 73007 | Average $\pm$ SD (mg/kg) | 56.3 $\pm$ 0.50 | 2,15 $\pm$ 0.13 | 1.65 $\pm$ 0.10 | 30.8 $\pm$ 0.50 | 4.98 $\pm$ 0.17 |
|              | RSD (%)                  | 0.9             | 6               | 6.1             | 1.6             | 3.4             |
|              | Bias (%)                 | -7.8 *          | 13 **           | 15 *            | -3.9 *          | -15 *           |
| 2711a        | Average $\pm$ SD (mg/kg) | 1280 $\pm$ 50   | 22.3 $\pm$ 0.50 | 3.03 $\pm$ 0.22 | 128 $\pm$ 5.0   | 2.88 $\pm$ 0.13 |
|              | RSD (%)                  | 3.9             | 2.2             | 7.3             | 3.9             | 4.4             |
|              | Bias (%)                 | -8.9 *          | -6.5 *          | -               | -8.9 *          | -4.3 *          |
| 2710a        | Average $\pm$ SD (mg/kg) | 5250 $\pm$ 100  | 45.5 $\pm$ 1.9  | 50 $\pm$ 0.0    | 3050 $\pm$ 58   | 8.40 $\pm$ 0.36 |
|              | RSD (%)                  | 1.9             | 4.2             | 0               | 1.9             | 4.2             |
|              | Bias (%)                 | -4.9 *          | -13 *           | -               | -11 *           | -7.8 *          |

Abbreviations: NCS, NCS Testing Technology Co., Ltd., Beijing, China; NIST, National Institute of Standards & Technology, Gaithersburg, MD, U.S.A; RSD, relative standard deviation; SRM, standard reference material.

**Table S2.** Limit of detection (LOD) and limit of quantification (LOQ) were calculated by multiplying the standard deviations of the blank samples ( $n = 6$ ) by three and ten, respectively. The six blank samples were taken through the whole measurement procedure, including the sample preparation steps. To express the limits on a weight/weight basis an average sample weight of 0.244 g and a dilution volume of 50 mL were used.

|             | Pb   | Sb   | Bi    | Cu   | U      | As    | Cd     | Zn  |
|-------------|------|------|-------|------|--------|-------|--------|-----|
| LOD (mg/kg) | 0.04 | 0.04 | 0.01  | 0.07 | 0.0002 | 0.02  | 0.002  | 0.9 |
| LOQ (mg/kg) | 0.13 | 0.13 | 0.033 | 0.23 | 0.0008 | 0.053 | 0.0071 | 2.9 |

**Table S3.** Average concentration of arsenic (As), cadmium (Cd), and zinc (Zn) in surface soil (0–2 cm) collected in the Greek refugee camp Mavrovouni. N indicates the number of replicates. See Figure 1 for location of sampling sites 1–8 and reference sites Ref 1 and Ref 2.

| Site # | N | As                       |         | Cd                       |         | Zn                       |         |
|--------|---|--------------------------|---------|--------------------------|---------|--------------------------|---------|
|        |   | Average $\pm$ SD (mg/kg) | RSD (%) | Average $\pm$ SD (mg/kg) | RSD (%) | Average $\pm$ SD (mg/kg) | RSD (%) |
| 1      | 7 | 12 $\pm$ 2.3             | 20      | 0.085 $\pm$ 0.0075       | 8.8     | 130 $\pm$ 10             | 7.7     |
| 2      | 7 | 15 $\pm$ 1.4             | 9       | 0.13 $\pm$ 0.0053        | 4.3     | 78 $\pm$ 2.3             | 2.9     |
| 3      | 7 | 40 $\pm$ 3.8             | 9.4     | 1.1 $\pm$ 0.21           | 20      | 100 $\pm$ 6.4            | 6.4     |
| 4      | 7 | 9.3 $\pm$ 0.48           | 5.2     | 0.097 $\pm$ 0.0024       | 2.5     | 141 $\pm$ 9.0            | 6.4     |
| 5      | 1 | 5                        |         | 0.38                     |         | 27                       |         |
| 6      | 7 | 13 $\pm$ 0.98            | 7.8     | 0.032 $\pm$ 0.0030       | 9.4     | 81 $\pm$ 3.3             | 4.1     |
| 7      | 7 | 18 $\pm$ 4.1             | 22      | 0.071 $\pm$ 0.026        | 37      | 87 $\pm$ 7.1             | 8.1     |
| 8      | 7 | 26 $\pm$ 3.0             | 12      | 0.080 $\pm$ 0.015        | 18      | 58 $\pm$ 2.1             | 3.7     |
| Ref 1  | 7 | 14 $\pm$ 6.4             | 47      | 0.20 $\pm$ 0.019         | 9.8     | 59 $\pm$ 9.3             | 16      |
| Ref 2  | 1 | 11                       |         | 0.18                     |         | 55                       |         |
